# Supplementary material for: Additive manufacturing of SiBCN/Si3N4w composites from preceramic polymers by digital light processing
Source: PubMed Central journal article supplement — RSC Adv. 2020 Feb 5;10(10):5681–9. doi: 10.1039/c9ra09598e (PMC9049584; doi:10.1039/c9ra09598e), 2020-02-05
Supplement: RA-010-C9RA09598E-s001.pdf [file RA-010-C9RA09598E-s001.pdf]

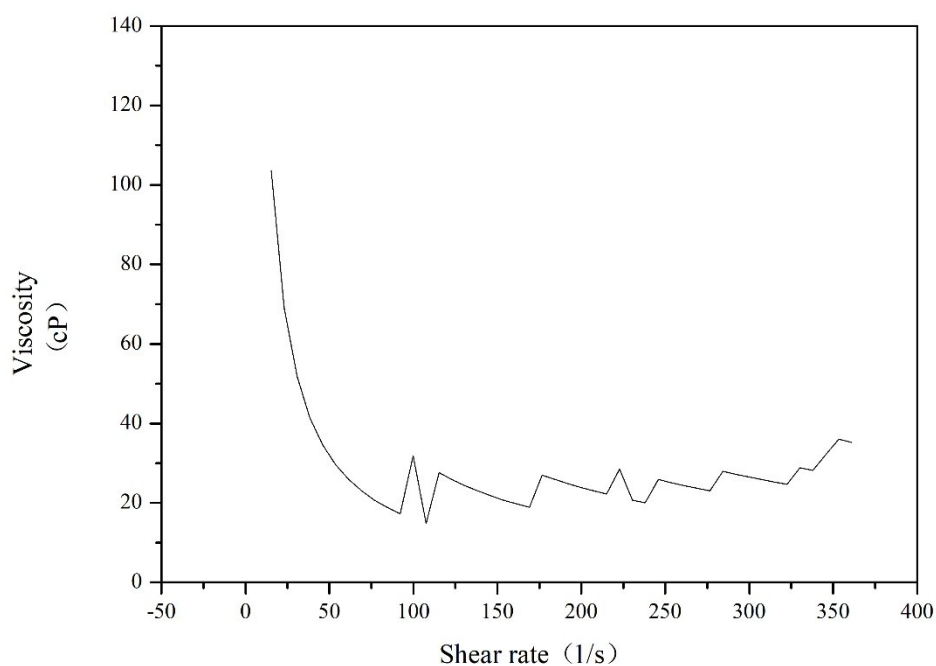

Figure s1 The rheology behavior of the slurry containing 60%  $\text{Si}_3\text{N}_4$

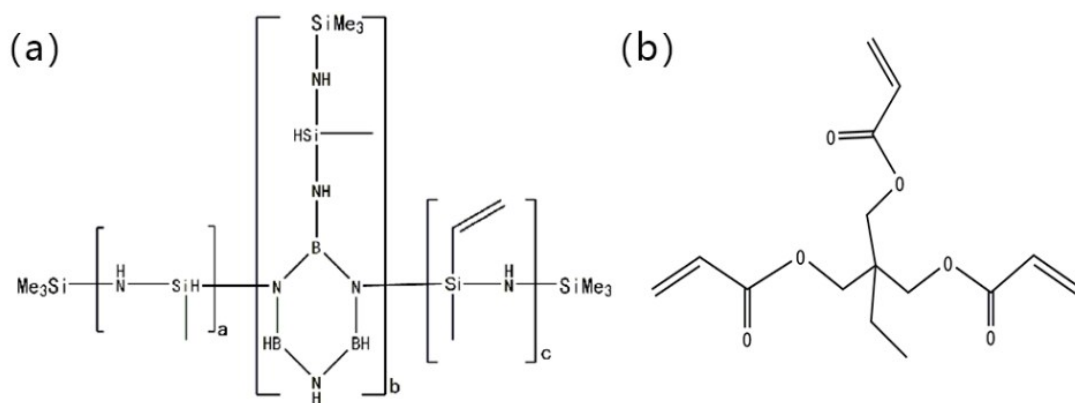

Figure s2 Schematic structure of (a) PBSZ and (b) TMPTA

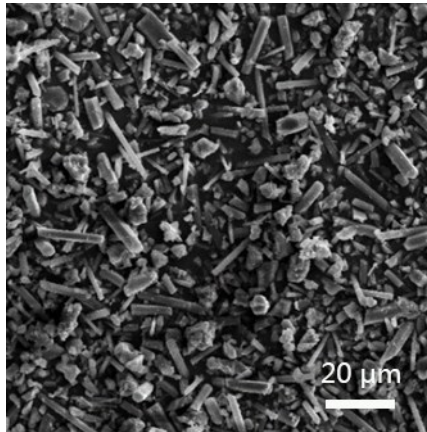

Figure s3 SEM image of the Si<sub>3</sub>N<sub>4</sub> whiskers

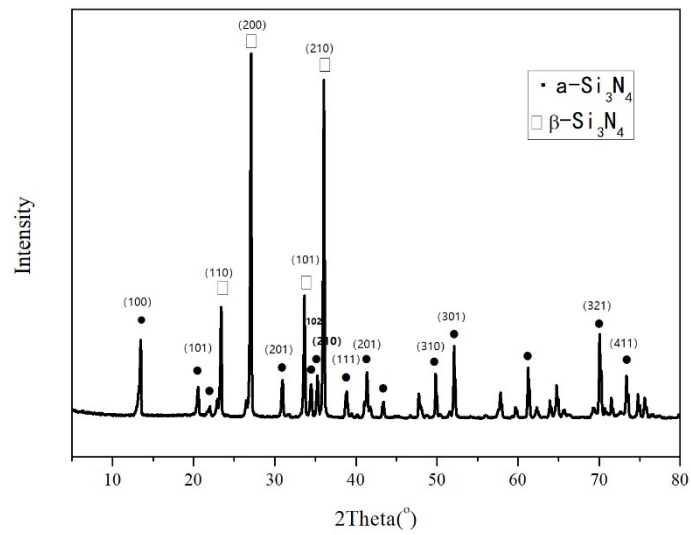

Figure s4 The XRD spectrum of the Si<sub>3</sub>N<sub>4</sub> whiskers
